# Supplementary material for: Formation of ZrC–SiC Composites from the Molecular Scale through the Synthesis of Multielement Polymers
Source: MDPI journal article supplement (doi:10.3390/ma14143901), 2021-07-13
Supplement: s1 [file s1]

# Formation of ZrC–SiC Composites from the Molecular Scale through the Synthesis of Multielement Polymers

Fabien Bouzat <sup>1</sup>, Romain Lucas <sup>1,\*</sup>, Yann Leconte <sup>2</sup>, Sylvie Foucaud <sup>1</sup>, Yves Champavier <sup>3</sup>, Cristina Coelho Diogo <sup>4</sup>, and Florence Babonneau <sup>5</sup>

<sup>1</sup> IRCER, Université de Limoges, UMR 7315, F-87068 Limoges, France; fbo@shimadzu.fr (F.B.: Fabien Bouzat); sylvie.foucaud@unilim.fr (S.F.)

<sup>2</sup> NIMBE, CNRS, CEA, Université Paris-Saclay, 91191 Gif-sur-Yvette, France; yann.leconte@cea.fr

<sup>3</sup> Service de RMN, BISCEM (US042 INSERM - UMS 2015 CNRS), CBRS, 2 rue Bernard Descottes, F-87025 Limoges, France; yves.champavier@unilim.fr

<sup>4</sup> Institut des Matériaux de Paris-Centre, CNRS, Sorbonne Université, FR2482, F-75005 Paris, France; cristina.coelho@upmc.fr

<sup>5</sup> Laboratoire de Chimie de la Matière Condensée de Paris, CNRS, Sorbonne Université, LCMCP, F-75005 Paris, France; florence.babonneau@sorbonne-universite.fr (F.B.: Florence Babonneau)

\* Correspondence: romain.lucas@unilim.fr; Tel.: +33587502350

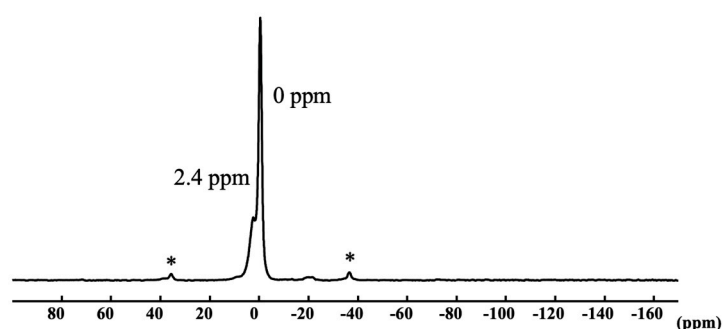

Figure S1. <sup>29</sup>Si CP-MAS NMR spectrum of *l*-cPCS.

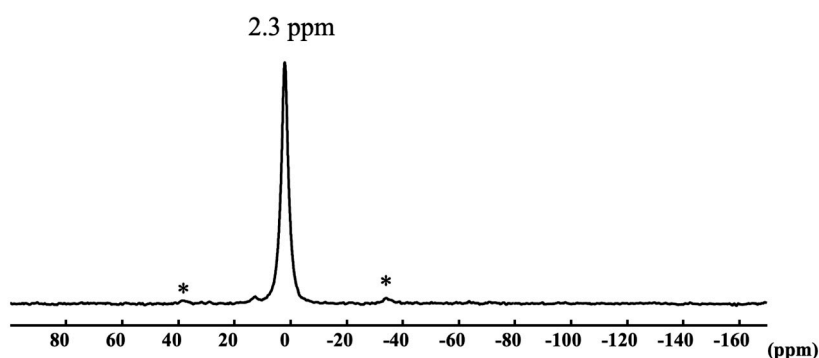

Figure S2. <sup>29</sup>Si CP-MAS NMR spectrum of *hb*-cPCS.

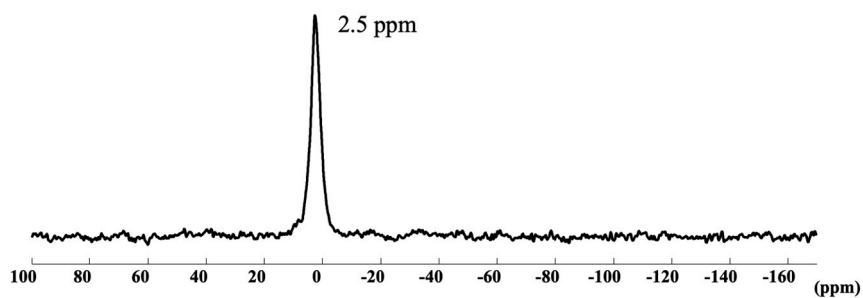

Figure S3.  $^{29}\text{Si}$  CP-MAS NMR spectrum of *hb-cPZCS*.

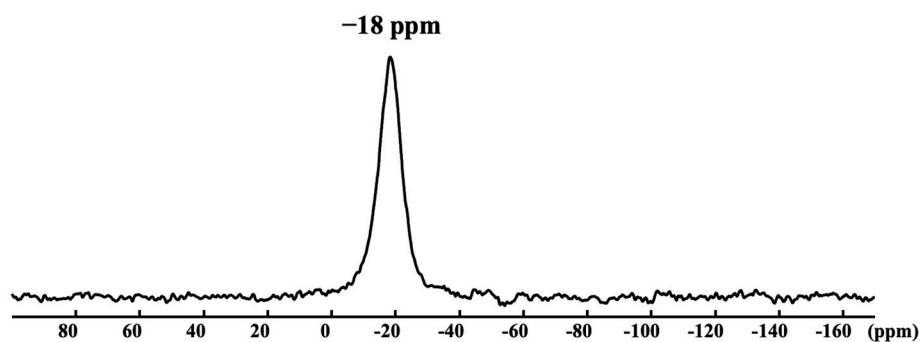

Figure S4.  $^{29}\text{Si}$  CP-MAS NMR spectrum of *l-hPCS*.

Table S1. Average bond enthalpy at 298 K.

| Bond | Average bond enthalpy (kJ.mol <sup>-1</sup> ) |
|------|-----------------------------------------------|
| N–N  | 159                                           |
| Si–C | 289                                           |
| C–N  | 293                                           |
| C–C  | 347                                           |
| N=N  | 418                                           |
| C=C  | 615                                           |

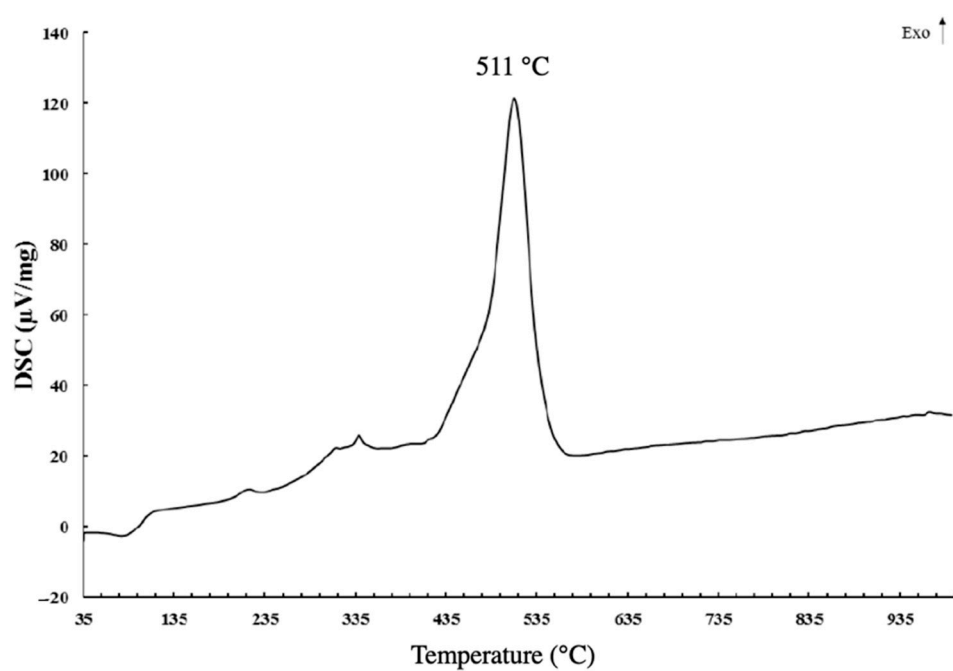

Figure S5. DSC of *l*-cPCS (Exo = exothermic)

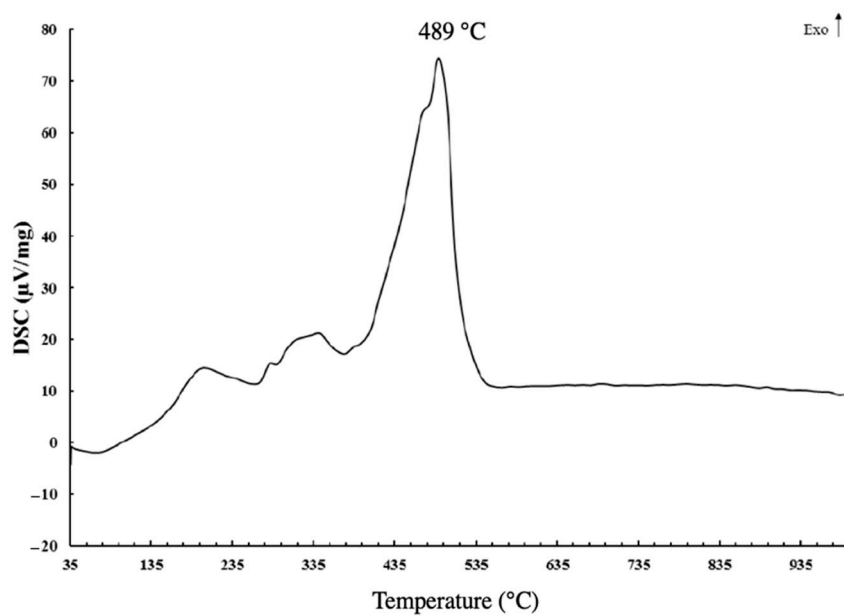

Figure S6. DSC of *hb*-cPCS (Exo = exothermic).

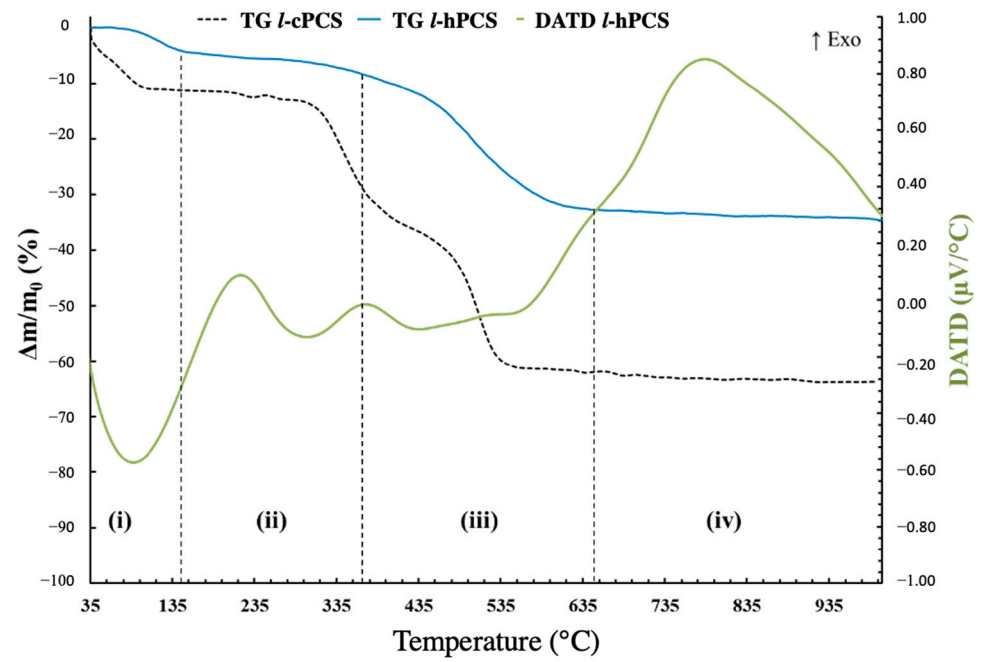

Figure S7. TG profiles of *l*-cPCS and *l*-hPCS and DATD of *l*-hPCS.

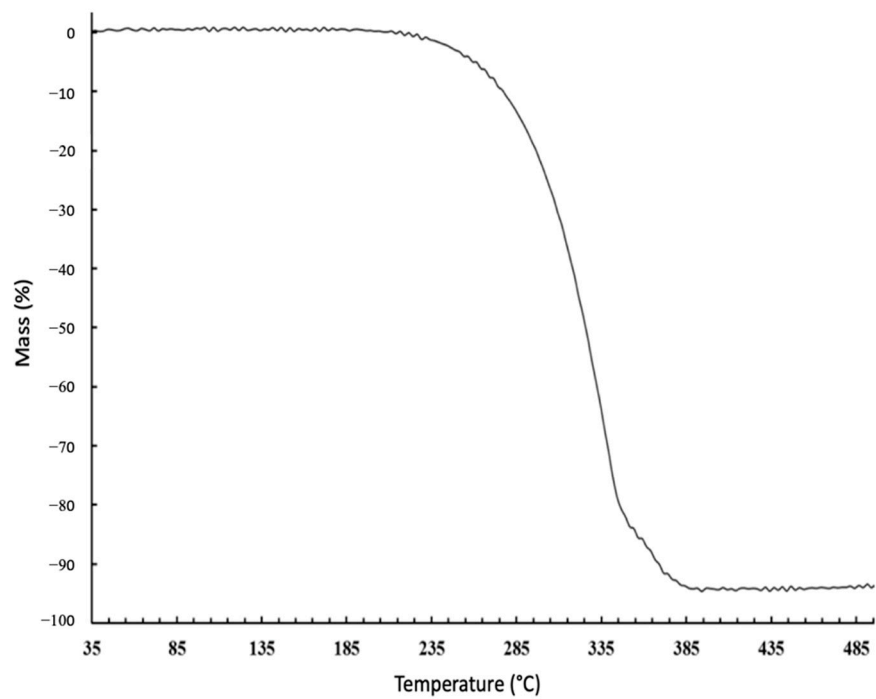

Figure S8. TG profile of ZrCp<sub>2</sub>Cl<sub>2</sub>.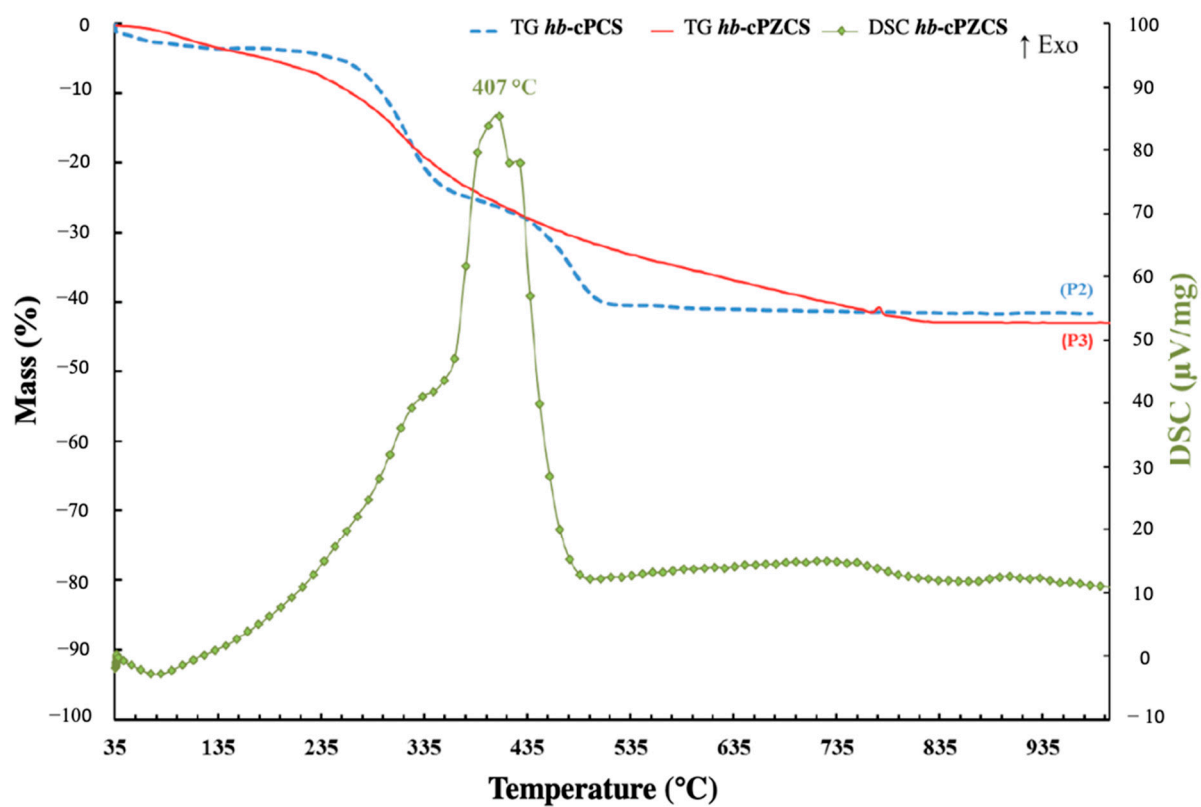Figure S9. TG profiles of *hb-cPCS* and *hb-cPZCS* and DSC of *hb-cPZCS* (Exo = exothermic).

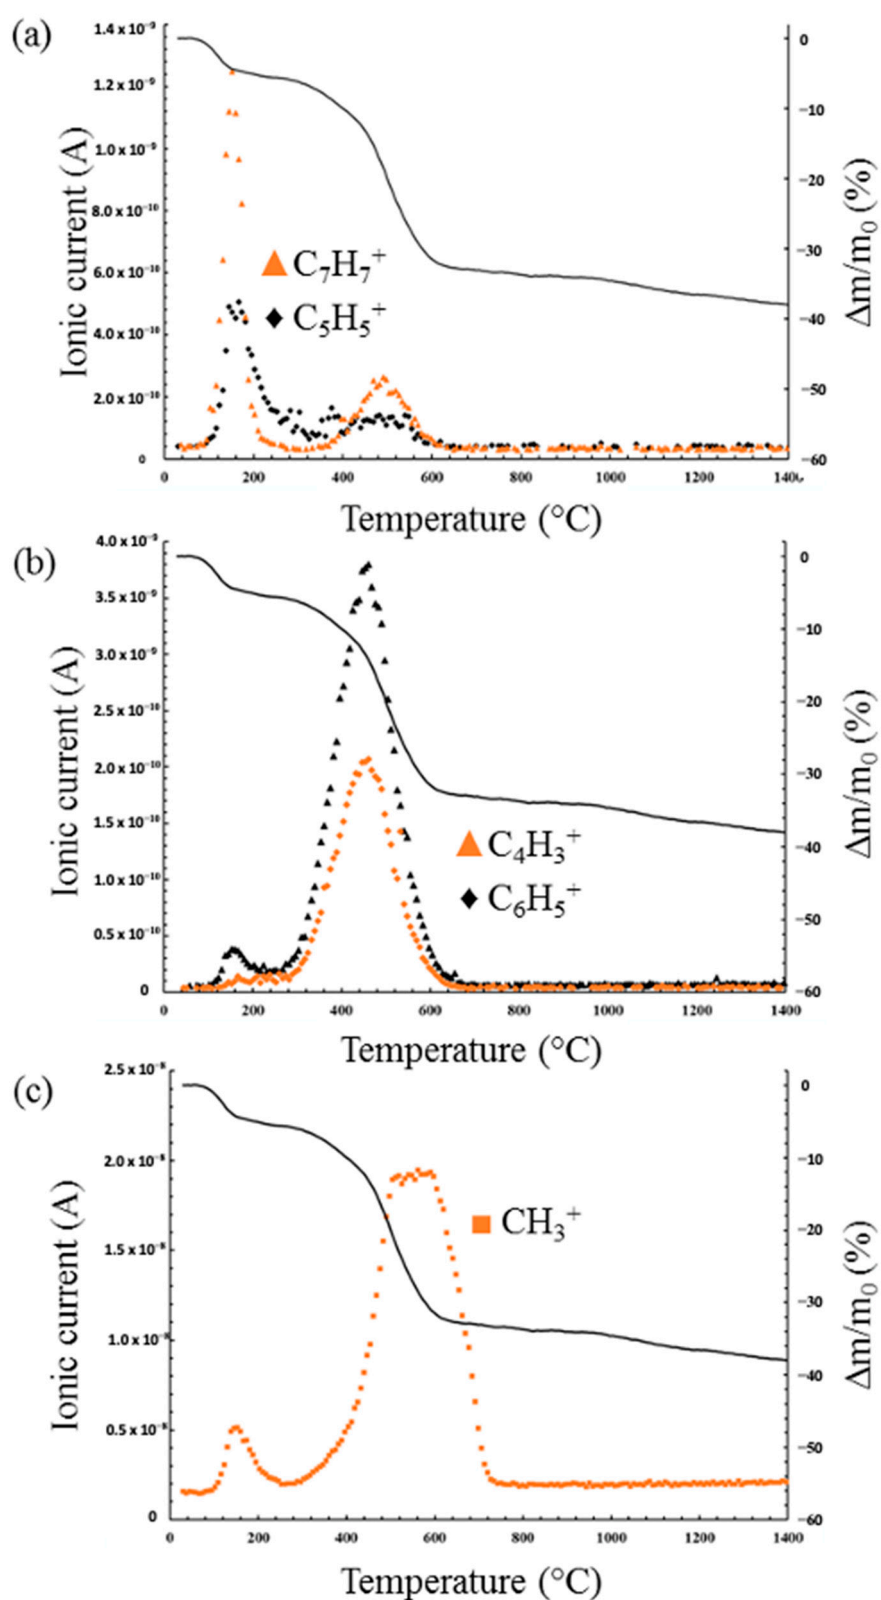

Figure S10. Mass spectrometry of the gaseous species released during the pyrolysis of *l*-hPCS.

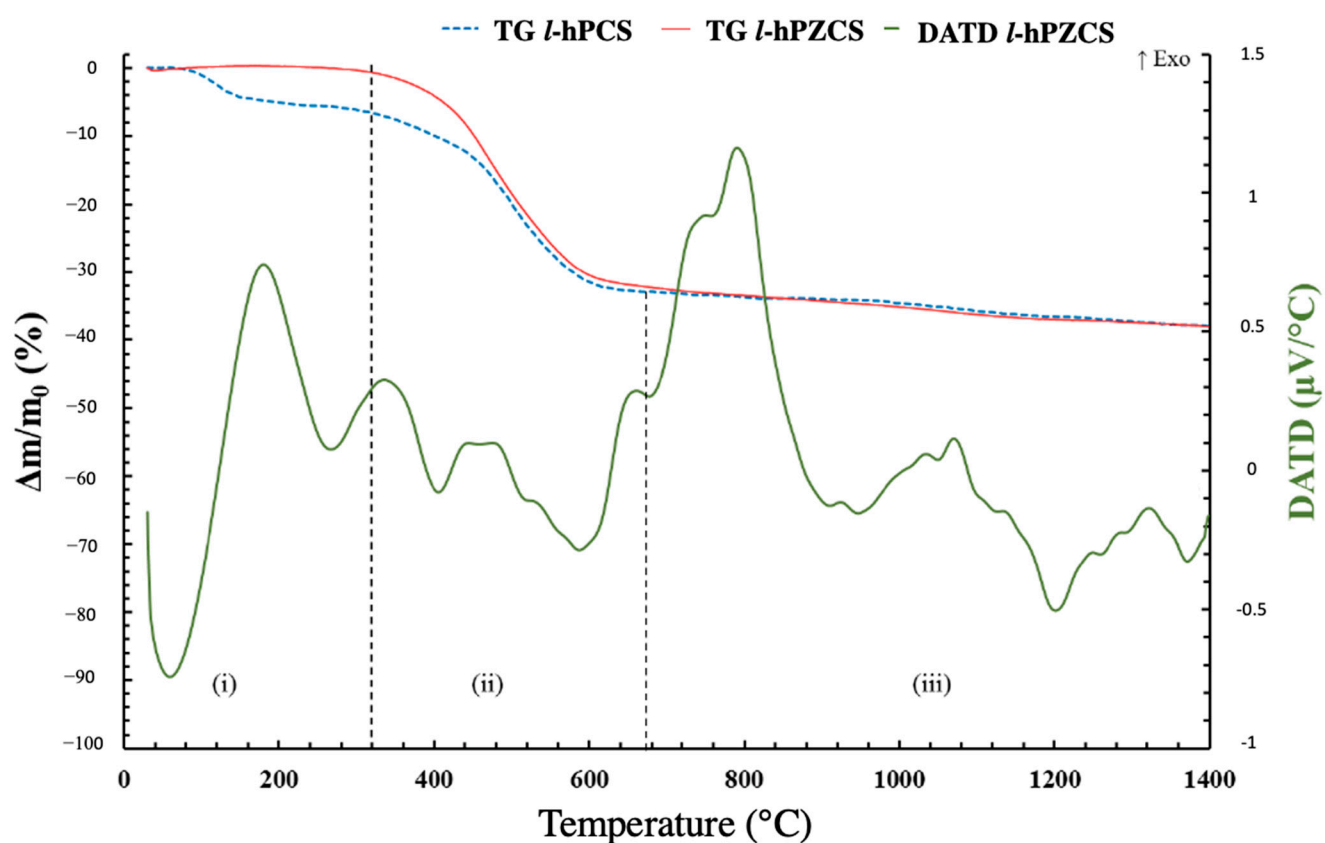

Figure S11. TG profiles of *l*-hPCS and *l*-hPZCS and DATD of *hb*-cPZCS (Exo = exothermic).

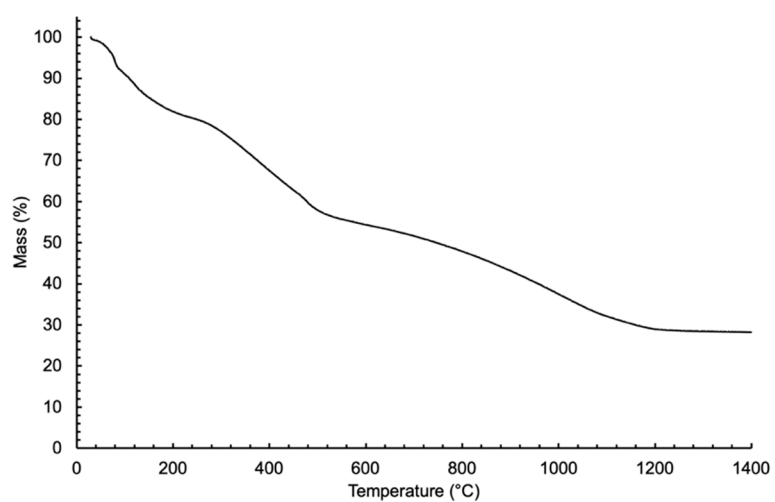

Figure S12. TG profile of ZrCp<sub>2</sub>H<sub>2</sub>.



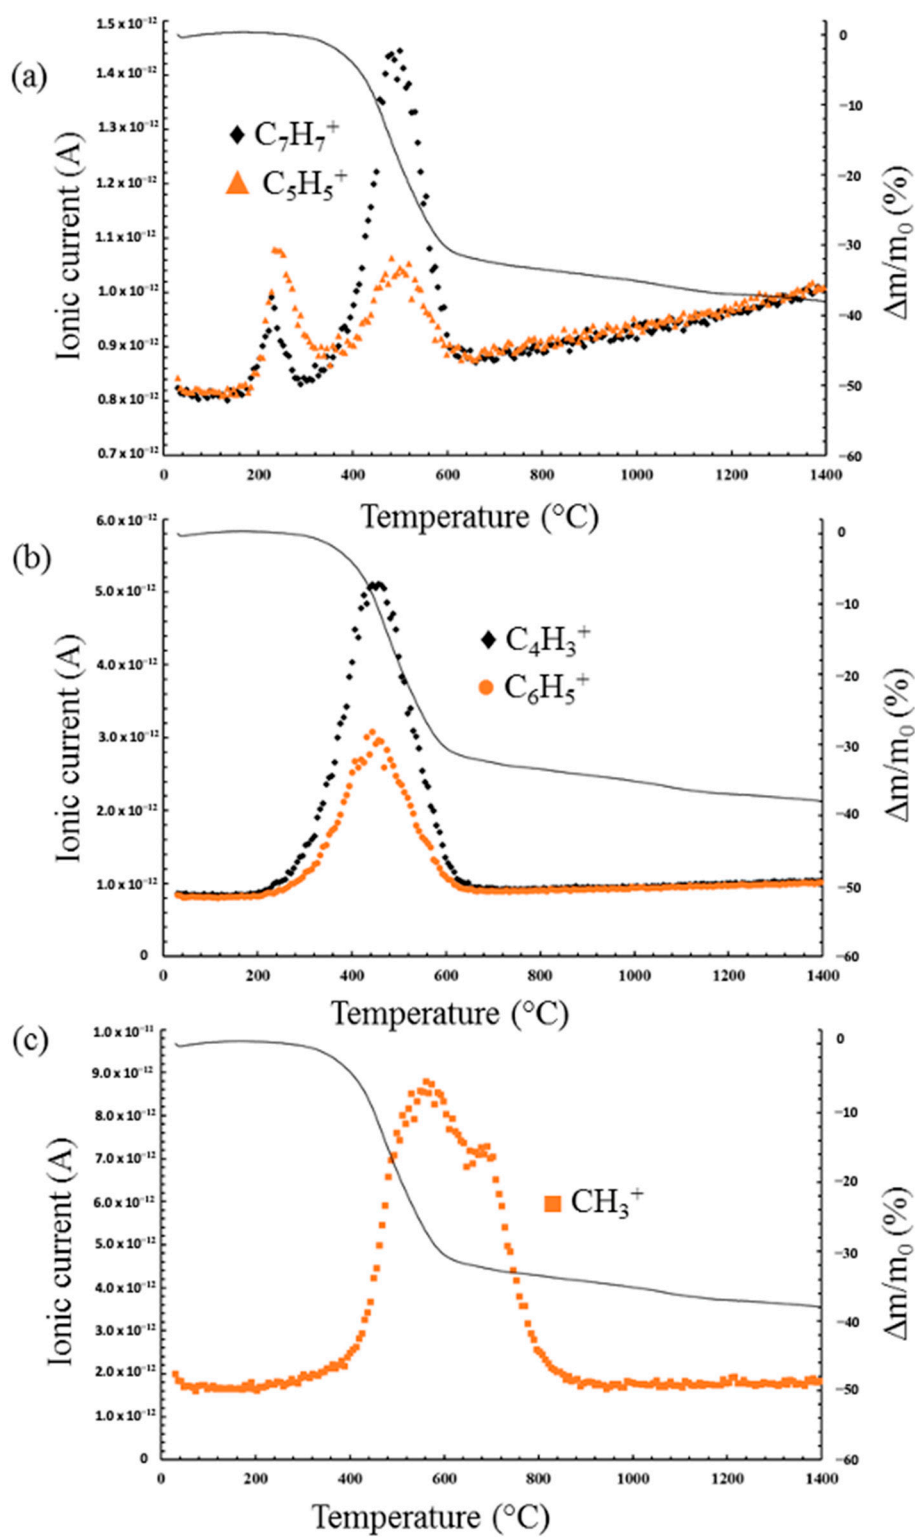

Figure S13. Mass spectrometry of the gaseous species released during the pyrolysis of *l*-hPZCS.
